# Supplementary material for: Individual Differences in Dynamic Functional Brain Connectivity across the Human Lifespan
Source: PubMed Central journal article supplement (PMC5120784; doi:10.1371/journal.pcbi.1005178), 2016-11-23
Supplement: pcbi.1005178.s004.pdf [file pcbi.1005178.s004.pdf]

| Performance (Word)    | Demographics      | Personality | Cognitive Factors  | State of Mind             |
|-----------------------|-------------------|-------------|--------------------|---------------------------|
| Criterion shift score | Age               | PANAS (6)   | OSIQ-S/O           | Arrival time              |
| Liberal Dprime        | Sex               | Big 5 (5)   | VVQ-W/P            | Meal (hours since)        |
| Conservative Dprime   | Education (years) | BIS/BAS (4) | Need for cognition | Hours of sleep            |
| Overall Dprime        | Dominant hand     |             | SBCSQ visual       | Physical/mental comfort   |
|                       |                   |             | SBCSQ verbal       | Beck Depression Inventory |
|                       |                   |             | Paper folding      | Alcohol (Y/N)             |
|                       |                   |             | Card rotation      | Exercise (Y/N)            |
|                       |                   |             |                    | Smoking (Y/N)             |
|                       |                   |             |                    | Caffeine (Y/N)            |
