# Supplementary material for: Individual Differences in Dynamic Functional Brain Connectivity across the Human Lifespan
Source: PubMed Central journal article supplement (PMC5120784; doi:10.1371/journal.pcbi.1005178), 2016-11-23
Supplement: pcbi.1005178.s005.pdf [file pcbi.1005178.s005.pdf]

| Performance                                                              | Demographics  | Personality | Cognitive Factors                 | State of Mind                                                                     |
|--------------------------------------------------------------------------|---------------|-------------|-----------------------------------|-----------------------------------------------------------------------------------|
| Attention CS<br>Face memory CS<br>Attention Dprime<br>Face memory Dprime | Military rank | EPQ-R (4)   | Working memory<br>Vocabulary test | MSW/MSF<br>PTSD Score<br>PTSD (Y/N)<br>Concussion score<br>Concussion 5 inventory |
