# Supplementary material for: Individual Differences in Dynamic Functional Brain Connectivity across the Human Lifespan
Source: PubMed Central journal article supplement (PMC5120784; doi:10.1371/journal.pcbi.1005178), 2016-11-23
Supplement: pcbi.1005178.s006.pdf [file pcbi.1005178.s006.pdf]

| Performance                                 | Demographics                                                                  | Personality             | Cognitive Factors | State of Mind                                                                                          |
|---------------------------------------------|-------------------------------------------------------------------------------|-------------------------|-------------------|--------------------------------------------------------------------------------------------------------|
| Hit rates<br>Failure rates<br>Reaction time | Height<br>Weight<br>Contraceptive use<br>Children (Y/N)<br>Number of children | Distracted<br>Motivated |                   | Stressed (Y/N)<br>Days since period<br>Usual hours of sleep<br>Drugs past 48h (Y/N)<br>MMSE (dementia) |
